1 *Title*

2 **Differential mitochondrial protein interaction profile between human translocator protein**  
3 **and its *A147T* polymorphism variant**

4

5 *Authors*

6 Prita R Asih<sup>1,#</sup>, Anne Poljak<sup>2</sup>, Michael Kassiou<sup>3</sup>, Yazi D Ke<sup>1</sup> and Lars M Ittner<sup>1,\*</sup>

7

8 *Affiliations*

9 <sup>1</sup> Dementia Research Centre, Faculty of Health and Medical Sciences, Macquarie University,  
10 Sydney, NSW, Australia

11 <sup>2</sup> Mark Wainwright Analytical Centre, University of New South Wales, Sydney, Australia.

12 <sup>3</sup> School of Chemistry, Faculty of Science, University of Sydney, Sydney, NSW, Australia

13

14 <sup>#</sup> present address: Flinders Health and Medical Research Institute, College of Medicine & Public  
15 Health, Flinders University, Adelaide, SA, Australia

16

17 \* correspondence should be addressed to L.M.I. ([lars.ittner@mq.edu.au](mailto:lars.ittner@mq.edu.au))

18

19

## 1 **Abstract**

2           The translocator protein (TSPO) has been implicated in mitochondrial transmembrane  
3 cholesterol transport, brain inflammation, and other mitochondrial functions. It is upregulated in  
4 glial cells during neuroinflammation in Alzheimer's disease. High affinity TSPO imaging  
5 radioligands are utilized to visualize neuroinflammation. However, this is hampered by the  
6 common A147T polymorphism which compromises ligand binding. Furthermore, this  
7 polymorphism has been linked to increased risk of neuropsychiatric disorders, and possibly  
8 reduces TSPO protein stability. Here, we used immunoprecipitation coupled to mass-  
9 spectrometry (IP-MS) to establish a mitochondrial protein binding profile of wild-type (WT)  
10 TSPO and the A147T polymorphism variant. Using mitochondria from human glial cells  
11 expressing either WT or A147T TSPO, we identified 30 WT TSPO binding partners, yet only 23  
12 for A147T TSPO. Confirming that A147T polymorphism of the TSPO might confer loss of  
13 function, we found that one of the identified interactors of WT TSPO, 14-3-3 theta (YWHAQ), a  
14 protein involved in regulating mitochondrial membrane proteins, interacts much less with A147T  
15 TSPO. Our data presents a network of mitochondrial interactions of TSPO and its A147T  
16 polymorphism variant in human glial cells and indicate functional relevance of A147T in  
17 mitochondrial protein networks.

18

19 *Keywords: translocator protein (TSPO), A147T, mitochondria, interactome, protein-protein*  
20 *interaction*

21

22

## 1 Introduction

2 The 18kDa translocator protein (TSPO) (1) is a five transmembrane domain protein that  
3 resides in the outer mitochondrial membrane (OMM), at contact sites between the outer and  
4 inner mitochondrial membrane (2). TSPO binds cholesterol with high affinity and possibly  
5 facilitates its transport across the OMM (3). However, its physiological role *in vivo* remains  
6 elusive. It has previously been reported that *TSPO* null mice present without overt phenotypes  
7 (4).

8 TSPO is highly conserved across species (5) and is ubiquitously expressed (6), with higher  
9 levels in cells and organs dedicated to steroid synthesis, such as the adrenal gland cortex (7).  
10 Interestingly, several brain conditions, including Alzheimer's disease (AD), Parkinson's disease  
11 (PD) and traumatic brain injury (TBI), show a significant increase in expression levels of TSPO,  
12 reflecting microglial activation that is likely to result in the production of protective  
13 neurosteroids, as a homeostatic response (8). This has been utilized diagnostically with the  
14 development of a large number of TSPO ligands used for imaging with positron emission  
15 tomography (PET) (9, 10). TSPO has furthermore been suggested as a drug target for  
16 neurodegenerative conditions (11) and may also be of therapeutic interest in cancer, as TSPO  
17 ligands reduce proliferation of cancer cells (12).

18 A single nucleotide polymorphism (*rs6971*) in the *TSPO* gene, which resulted in the  
19 substitution of alanine by threonine at position 147 (*A147T*) in the helical turn before the  
20 cholesterol binding motif, has hampered the use of TSPO radio-labelled ligands as an active  
21 biomarker for inflammation by *in vivo* visualization (PET imaging) (13). This one point mutation  
22 is observed predominantly in Caucasian populations, in which approximately 10% are  
23 homozygous and up to 30% are heterozygous (14). The *A147T* polymorphism not only decreases

1 the binding affinities of many TSPO ligands but has also been shown to affect pregnenolone  
2 production and was found to be associated with neurological diseases like bipolar disorder (15,  
3 16). However, these findings were indirectly demonstrated through the actions of its ligands. To  
4 obtain insight into the functional relevance of this *A147T* point mutation, we asked how this  
5 mutation might impact the protein interactome of TSPO within the mitochondrial complex.  
6 Therefore, we transfected human glioma cell U87MG with full length human *TSPO<sup>WT</sup>* or its  
7 *A147T* variant (both with C-terminal V5 tags) and isolated mitochondria from these cells. This  
8 mitochondria enriched fraction was subsequently immunoprecipitated for the tagged proteins and  
9 further subjected to mass spectrometry (IP-MS). Selected interaction partners were further  
10 validated by co-immunoprecipitation.

11

## 12 **Materials and Methods**

### 13 **Mitochondria Isolation**

14 Mitochondria were isolated from U87MG cells based on a previously described protocol  
15 (17). Briefly, cell pellets were resuspended in 1 mL aliquots of ice-cold RSB hypo buffer (10  
16 mM NaCl, 1.5 mM MgCl<sub>2</sub>, 10 mM Tris-HCl (pH 7.5) containing cOmplete EDTA-free protease  
17 inhibitor)) and transferred to a 2-mL Dounce homogenizer. Cells were allowed to swell for 5–10  
18 min. The progress of the swelling was checked using a phase-contrast microscope. The swollen  
19 cells were lysed with several strokes of the B pestle, pressed straight down the tube with a firm,  
20 steady pressure. Immediately 500μL of ice-cold 2.5× MS homogenization buffer (525 mM  
21 mannitol, 175 mM sucrose, 12.5 mM Tris-HCl (pH 7.5), and 2.5 mM EDTA (pH 7.5) with  
22 protease inhibitor)) was added to each sample to obtain a final concentration of 1× MS

1 homogenization buffer. Subsequently, the top of the homogenizer was covered with Parafilm and  
2 mixed by inverting twice. A portion of the homogenate was retained to perform enzyme marker  
3 assays. Then the homogenate was transferred to a centrifuge tube for density gradient  
4 centrifugation. The final volume was brought to 2 mL with ice-cold 1× MS homogenization  
5 buffer (210 mM mannitol, 70 mM sucrose, 5 mM Tris-HCl (pH 7.5), and 1 mM EDTA (pH 7.5)  
6 with protease inhibitor)). Afterwards, the homogenate was centrifuged at 1300×g for 5 min to  
7 remove nuclei, unbroken cells, and large membrane fragments. The supernatant was poured into  
8 a clean centrifuge tube and centrifuged again at 1300×g for 5 min. This centrifugation step was  
9 repeated two more times. The supernatant from the third centrifugation was transferred to a clean  
10 centrifuge tube and centrifuged at 17,000×g for 15 min to obtain the mitochondria (pellet). The  
11 isolated mitochondria were washed in ice-cold 1× MS buffer and centrifuged at 17,000×g. The  
12 supernatant was discarded and the resulting pellet (mitochondria) was resuspended in NP40  
13 buffer containing protease inhibitor .

#### 14 **Immunoprecipitation**

15 Immunoprecipitation (IP) of transfected cells was carried out as previously described  
16 (18). Following harvesting the transfected cells and isolating the mitochondria, the sample(s)  
17 were pre-incubated with protein G-coupled magnetic beads (Invitrogen) for 1 hour. Samples  
18 were then incubated with antibodies against V5 overnight at 4°C. The following day, the samples  
19 were incubated with protein G-coupled magnetic beads (1 hour at 4°C on a rotating platform)  
20 and then washed 4 times with IP buffer (50mM HEPES (pH 7.5), 140mM sodium chloride, 0.2%  
21 (v/v) NP40 with protease inhibitors). The precipitate was recovered from the beads by boiling in  
22 hot (95°C) sample buffer (1M Tris-HCl (pH 8.0), 20% (v/v) β-mercaptoethanol, 40% (v/v)  
23 glycerol, 9.2% (w/v) SDS and 0.2% (w/v) bromophenol blue) and proteins were separated by

1 SDS-PAGE, Western blot transferred to PVDF membrane, and probed for Myc (1:5000) and V5  
2 (1:5000). The second approach of IP of transfected cells was carried out by immunoprecipitation  
3 with antibodies against respective interacting proteins. The subsequent procedure was similar to  
4 that outlined above, and immunoblotting was carried out with V5 (1:5000).

## 5 **Immunoblotting**

6 For SDS PAGE and Western blot analysis of TSPO transfected cells, 10 $\mu$ g protein was  
7 loaded onto SDS PAGE gels as the input and the entire immunoprecipitate for each sample was  
8 loaded in successive lanes. Proteins were subsequently electrophoretically transferred onto  
9 nitrocellulose membranes (GE Healthcare) in a Trans-Blot SD Semidry Transfer Cell (BioRad)  
10 at 25V for 45 minutes. Membranes were subsequently blocked in 5% (w/v) BSA in Tris-buffered  
11 saline containing 0.1% (v/v) Tween20 (TBS-T) for 1 hour at ambient temperature, followed by  
12 incubation with the primary antibody diluted in 5% (w/v) BSA/TBS-T (overnight at 4°C on a  
13 shaking platform). For IP experiments using TSPO-transfected cells, the primary antibodies used  
14 were to V5 (1:5000), myc (1:5000), VDAC1 (1:1000), Hsp90AA1 (1:2000), YWHAЕ (1:1000),  
15 YWHAZ (1:1000), or YWHAG (1:1000). The following day the primary antibody was removed,  
16 the membranes washed three times with TBS-T and incubated with alkaline phosphatase-coupled  
17 secondary which species anti-mouse (e.g., sheep anti-mouse, rabbit anti-mouse, goat anti mouse,  
18 etc??) IgG or IgM antibodies (1:10,000, Sigma) in 1% (w/v) BSA/TBS-T for 45 minutes at room  
19 temperature. Protein bands were visualized with Immobilon Chemiluminescent Alkaline  
20 Phosphatase substrate (Millipore) and detected in a VersaDoc Model 4000 CCD camera system  
21 (BioRad). To determine equal loading and for normalization, membranes were stripped by  
22 washing in distilled water for 5 minutes, followed by 0.2M sodium hydroxide for 10 minutes and

1 then distilled water for 5 minutes after which they were reprobed with antibodies against  
2 GAPDH.

### 3 **Expression plasmids**

4 To obtain expression constructs for transient transfection of U87MG cells, the coding  
5 sequence encoding human TSPO (*hTSPO*) was amplified from cDNA previously generated by  
6 reverse transcription from total HEK293 mRNA isolated using Trizol (Life Technologies) and  
7 cloned into either a pENTR/SD/TOPO vector (Invitrogen) or pGEM-T-Easy vector (Promega).  
8 For cloning into pGEM-T-Easy vector, *hTSPO* was amplified by PCR using PfuTurbo High-  
9 Fidelity DNA Polymerase (Agilent Technologies). A polyA tail was added to this blunt-end PCR  
10 product and ligated into the pGEM-T-Easy vector overnight at 4 °C. Ligated vectors are  
11 transformed into *One Shot Top10 E. coli* for pENTR/SD/TOPO, *DH5 $\alpha$ E. Coli* for pGEM-T-Easy  
12 vectors and plated out onto plates containing 50  $\mu$ g/ml kanamycin (pENTR/SD/TOPO) and 100  
13  $\mu$ g/ml ampicillin (pGEM-T-Easy). Positive clones were identified via restriction digest and  
14 confirmed via DNA sequencing.

### 15 **Cloning and site-directed mutagenesis**

16 Site-directed mutagenesis was carried out to introduce the *A147T* point mutation into the  
17 *hTSPO* cDNA according to the Agilent Technologies' Quikchange XL Site-directed Mutagenesis  
18 Kit instructions. Briefly, mutagenic oligonucleotide primers incorporating the *A147T* point  
19 mutation were used to introduce the mutation into *hTSPO* in pGEM-T-Easy. Twenty-five cycles  
20 of PCR were carried out in a final volume of 50 $\mu$ l, containing 1ng of *hTSPO* in pGEM-T-Easy as  
21 template, 10pmol of forward and reverse primers, and 2.5 units of *PfuTurbo*. The annealing  
22 temperature was set to 58 °C. The PCR products generated were digested with 10 units of *Dpn I*

1 restriction enzyme at 37 °C for 3 h to digest the parental DNA template. Digested PCR products  
2 were transformed into *XLI blue* competent cells and plated onto agar plates containing 100  
3 µg/ml Ampicillin. Positive clones were confirmed via DNA sequencing analysis.

#### 4 **Transformation of plasmid DNA**

5 Chemically competent *E. coli* cells (100 µl) were thawed on ice and transferred into a  
6 chilled 14 ml polypropylene round-bottom tube (BD Biosciences). Then 50ng of the desired  
7 plasmid DNA was added to the *E. coli* and the *E. coli*/DNA mixture was incubated for 20-30  
8 minutes on ice. Subsequently, this *E. coli*/DNA mix was heat-shocked for 40 seconds in a 42 °C  
9 water bath and cooled on ice for 2 minutes. S.O.C medium (250 µl, Life Technologies) was  
10 added and tubes shaken at 200 rpm for 1 hour at 37 °C. The transformed *E. coli* were plated onto  
11 Lysogeny Broth (LB) agar plates with the appropriate antibiotics and incubated overnight at 37  
12 °C. For subsequent analysis of clones obtained, single colonies were picked and inoculated in LB  
13 medium containing ampicyline, incubated overnight at 37 °C and plasmid DNAs were purified  
14 using the Promega Wizard mini-prep kit.

#### 15 **Transient transfection**

16 The polyethylenimine (PEI) method of transfection was used to deliver plasmid DNA  
17 into U87MG cells in a 10 cm dish as previously described (19) with minor modifications.  
18 Briefly, cells were plated at the density of  $0.5 \times 10^6$  per 10cm dish and allowed to become  
19 adherent. The next day, when cells reached 60-80% confluency, the media was changed 30  
20 minutes before transfection. Then, the PEI-DNA mixture was prepared using 3:1 ratio of PEI to  
21 DNA (w/w). Briefly, 30 µg of PEI (1 gram PEI dissolved in 1000 ml distilled water pH7) was  
22 diluted into a total volume of 750 µl of 0.9% NaCl. Then, 10 µg of DNA was diluted into a total



1 volume of 750  $\mu$ l of 0.9% NaCl. Subsequently, the diluted DNA was added to the diluted PEI  
2 and incubated at ambient temperature for 15 minutes. The PEI-DNA mixture was then added  
3 dropwise to the 10cm dish and left for 48 hours, after which the cells were ready to be harvested  
4 in NP-40 lysis buffer with protease inhibitor.

## 5 **Mass-spectrometry and data analysis**

6 Briefly, IP samples were desalted, and buffer exchanged using 3-kDa Amicon filter units  
7 (EMD Millipore) using 50 mM sodium bicarbonate. Protein sample (400  $\mu$ g) was reduced by  
8 adding 2  $\mu$ l of Tris(2-carboxyethyl)phosphine (Sigma) and incubating samples at 60 °C for 1 h.  
9 Samples were then alkylated by adding 1  $\mu$ l of iodoacetamide (37 mg/ml) to block cysteine side  
10 chains (10 min, ambient temperature). Protein samples were digested using 4  $\mu$ g of trypsin  
11 (sequencing grade, low autolysis trypsin; Promega), at 37 °C for 16 h. Digested samples were  
12 briefly spun in a microcentrifuge and pH checked and, if necessary, adjusted to pH 9–10 with a  
13 few microlitres of sodium carbonate (500 mM Na<sub>2</sub>CO<sub>3</sub>). Samples were analyzed in biological  
14 triplicates (6  $\mu$ g injected per run) by LC-MS/MS (HCD on the QExactive Plus: Thermo Electron,  
15 Bremen, Germany), followed by Mascot searching to identify peptides and proteins. Adaptations  
16 of previously published protocols were used (20, 21).

17 Only proteins with  $\geq 2$  annotated peptides in Mascot were used for further analysis. The  
18 Mascot Score is a statistical score for how well the experimental data match the database  
19 sequence (22), and Mascot parameters included using 15-ppm parent mass tolerance, 0.5 Da  
20 fragment mass tolerance, and Protein False Discovery Rate equal or lower than 1%. Searches  
21 were conducted against several databases such as Uniprot, Swissprot, and NCBI. Mascot results  
22 are statistically interpreted using a Java-based re-implementation of the Peptide Prophet  
23 Algorithm (23), which converts search engine scores into probabilities of peptide identification.

1 Data compilation and quantification across 3 IP biological replicates for each of the experimental  
2 groups were performed using Scaffold 2.4.0 and a 95% protein probability threshold was  
3 applied. Scaffold computes protein grouping at two levels: first to determine the identified  
4 protein groups within a single MS/MS sample, and again across all MS/MS samples in the  
5 experiment to determine an experiment wide protein identification list (24). Scaffold uses a  
6 reimplementaion of the Peptide Prophet algorithm to combine peptides into protein  
7 identifications using a statistical model that considers a distribution of the number of peptides  
8 assigned to each protein. Quantitative analysis from ScaffoldQ was utilized by averaging over  
9 the 3 biological replicates and comparisons applying a  $p$  value (Student's  $t$  test) criterion of  $p <$   
10 0.05 to determine the statistically significant differentially bound proteins. Protein ontology was  
11 analyzed using DAVID gene ontology database (v6.8) using gene ontology annotations for the  
12 entire human genome as the background list. Interactomes and network properties were visually  
13 represented using CytoScape (v3.7.1). Existing evidence for protein–protein interactions of  
14 TSPO was derived from BioGRID (v3.1.180) and STRING (v10.5) databases and through  
15 literature searching.

16

17

## 1 Results

2

### 3 Identification of the hTSPO<sup>WT</sup> and hTSPO<sup>A147T</sup> interacting proteins in human glioma cells

4

5 Interactions of TSPO with other proteins have been characterized by conventional  
6 methods, such as in-gel digestion followed by mass-spectrometry (MS) analysis (25) or pull-  
7 down methods (26) which are limited by antibody affinity, lysis, and solubility conditions.  
8 Moreover, identification of interaction partners of the cholesterol-binding domain of TSPO (the  
9 CRAC domain) have been identified by coimmunoprecipitation (27). However, identification of  
10 TSPO interaction partners in the context of the frequent *A147T* polymorphism have not been  
11 studied. To gain insight into the effects of the *A147T* polymorphism on mitochondrial TSPO  
12 interactions, we employed immunoprecipitation coupled to mass-spectrometry (IP-MS). The use  
13 of IP-MS is considered the gold standard for sensitivity and specificity of identification of  
14 protein interactions (complexes) (28). We tagged full-length human *TSPO<sup>WT</sup>* and *TSPO<sup>A147T</sup>* with  
15 a C-terminal V5 tag for expression in U87MG cells, a human astro-/microglioma cell line of  
16 CNS origin (29). V5-tagged TSPO protein levels were equally transfected for both *TSPO<sup>WT</sup>* and  
17 *TSPO<sup>A147T</sup>* (**Fig 1A**). Isolated mitochondria from these cells showed enrichment of the  
18 mitochondrial protein voltage-dependent anion channel 1 (VDAC1) and absence of the nuclear  
19 protein heterogenous nuclear ribonucleoproteins (hnRNP), indicating successful purification of  
20 mitochondria (**Fig 1B-D**). Furthermore, equal expression levels of V5-tagged *TSPO<sup>WT</sup>* and  
21 *TSPO<sup>A147T</sup>* was confirmed in isolated mitochondria by the immunoblotting (**Fig 1C**).  
22 Optimization of the V5 antibody for IP showed that 2  $\mu$ l of antibody per 400  $\mu$ g total protein was  
23 the optimum condition to pull down both V5-tagged *TSPO<sup>WT</sup>* and *TSPO<sup>A147T</sup>* (**Fig 1D**). To

1 assess the specificity of V5 antibody and to control for non-specific binding, both isolated  
2 mitochondria of TSPO<sup>WT</sup> and TSPO<sup>A147T</sup> expressing cells as well as non-transfected cells were  
3 immunoprecipitated using IgG antibody that served as negative control (**Fig 1D**). Immunoblot of  
4 input (10% of the total lysates) further confirmed comparable expression levels between  
5 TSPO<sup>WT</sup> and TSPO<sup>A147T</sup> whereas immunoblot of unbound V5-tagged proteins (FT = flow  
6 through) showed a relatively small amount of non-precipitated TSPO (**Fig 1D**). Next, one third  
7 of the IP samples were run by SDS PAGE, silver stained, and the result indicated that TSPO<sup>A147T</sup>  
8 had fewer bands and/or weaker intensity compare to TSPO<sup>WT</sup> samples (**Fig 1E**). Overall, these  
9 results show that V5-tagged TSPO expression in TSPO<sup>WT</sup> and TSPO<sup>A147T</sup> yields similar  
10 expression levels in isolated mitochondria of U87MG cells, which supported efficient and  
11 comparable immunoprecipitation for subsequent MS.

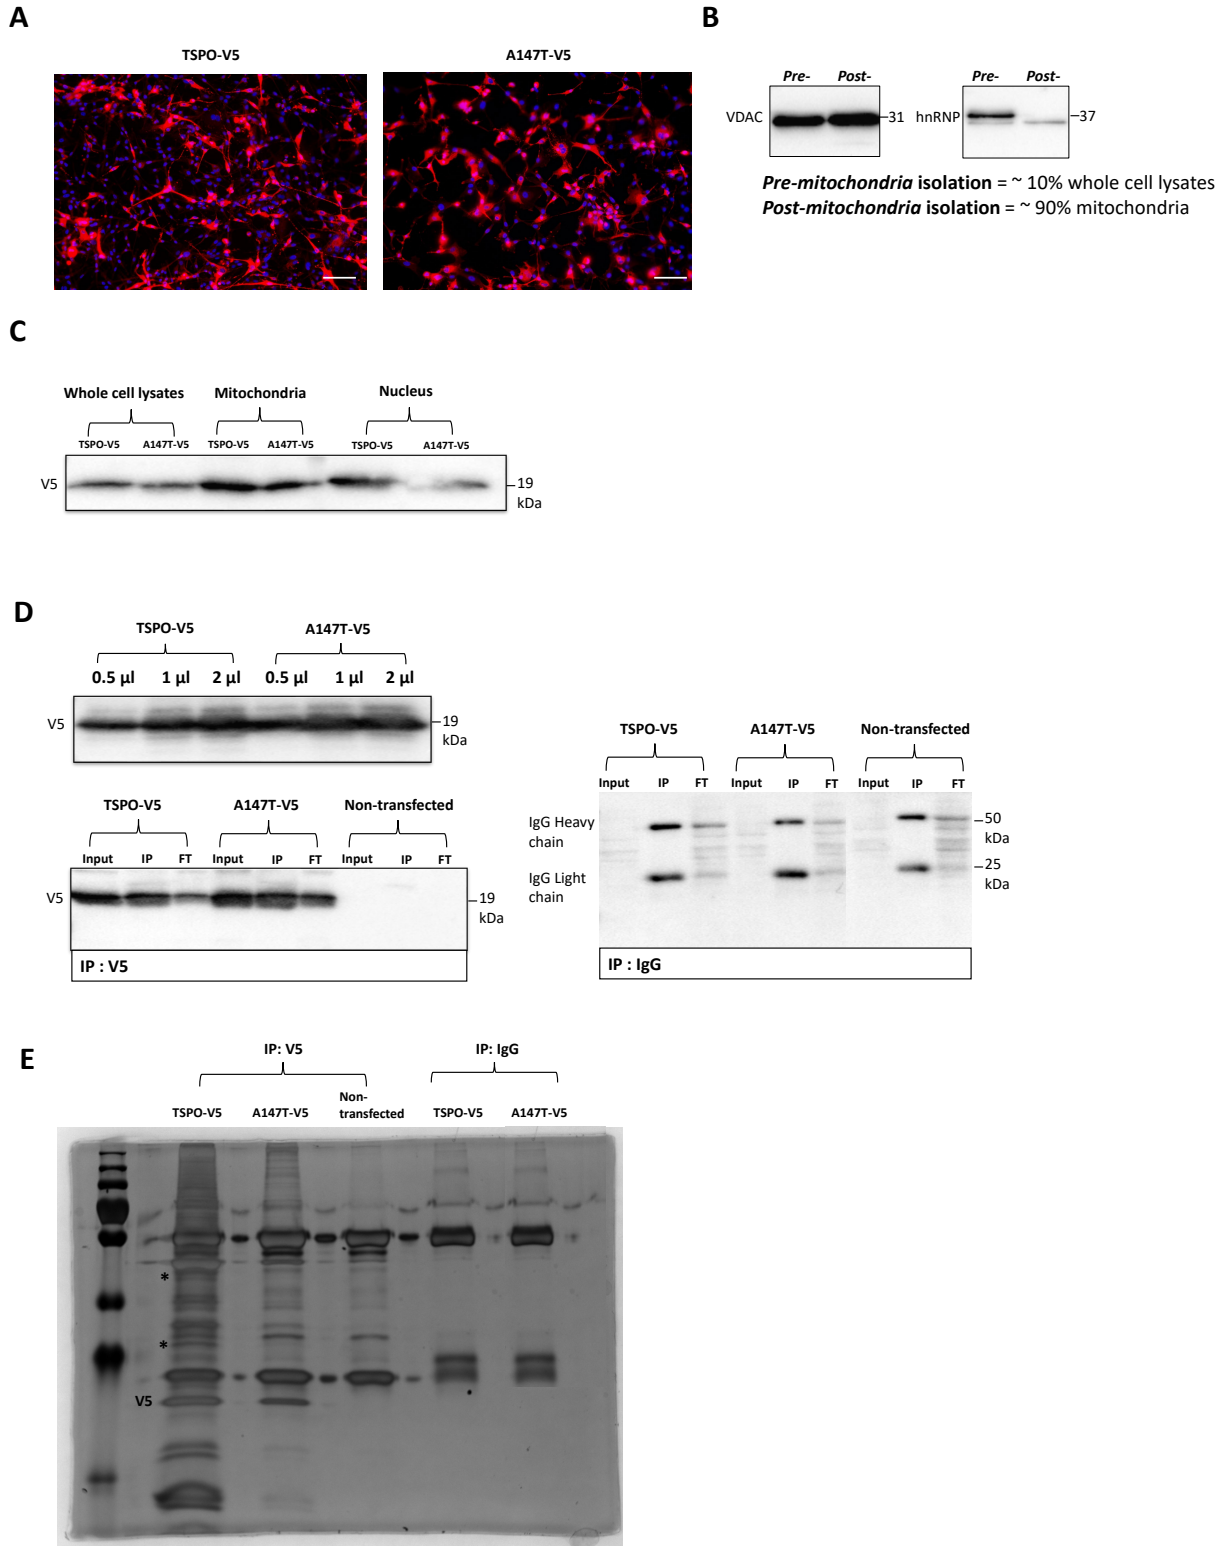

1

2 **Fig 1. Optimization of sample preparation for the identification of binding partners between**

3 **human TSPO and its mutant *A147T* by IP-MS. A) Transfection efficiency of V5-tagged TSPO<sup>WT</sup> and**

1 TSPO<sup>A147T</sup> in U87MG cells (42.6% ± 5.93), indicating equal protein expression levels; *red*, anti-V5  
2 immunofluorescence and *blue*, DAPI indicating cell nuclei. n=3. **B)** Mitochondrial enrichment of U87MG  
3 cells as assessed by Western blot for VDAC as a mitochondrial marker protein and hnRNP as a nuclear  
4 marker protein, indicating that purified mitochondria were isolated, n=2. **C)** Representative immunoblot  
5 of mitochondrial lysates from transfected U87MG cells with V5-tagged TSPO<sup>WT</sup> and TSPO<sup>A147T</sup>. This  
6 confirms equal expression levels of V5 in both TSPO<sup>WT</sup> and TSPO<sup>A147T</sup> extracts. **D)** Immunoprecipitation  
7 of TSPO<sup>WT</sup> and TSPO<sup>A147T</sup> from transfected U87MG cells with increasing amount of mouse V5 antibody,  
8 with 2µg per 400 µg of total protein chosen for subsequent experiments . Non-specific mouse IgG  
9 antibody was used as a negative control. Immunoblot of input (10% of the total lysates) confirms  
10 comparable expression levels of V5 tag between TSPO<sup>WT</sup> and TSPO<sup>A147T</sup>. Immunoblot of unbound V5 tag  
11 shows the amount of non-precipitated TSPO. **E)** Immunoprecipitation of TSPO<sup>WT</sup> and TSPO<sup>A147T</sup> from  
12 transfected U87MG cells. Precipitated proteins were visualized by silver staining of SDS-PAGE.

13

14 To identify the interaction partners of V5-tagged TSPO<sup>WT</sup> and TSPO<sup>A147T</sup>, we performed  
15 MS of enriched mitochondrial fractions from U87MG cells at sub-confluency and transfected  
16 with constructs expressing either V5-tagged *TSPO<sup>WT</sup>*, V5-tagged *TSPO<sup>A147T</sup>*, or non-transfected  
17 cells. A schematic outline of the IP-MS analysis procedure and results is shown in **Fig 2A**. For  
18 protein identification, immunoprecipitated proteins were trypsin digested in-solution and the  
19 resulting peptides were identified by liquid chromatography tandem mass spectrometry (LC-  
20 MS/MS). The mass spectrometric data contain a list of the accurate peptide masses and peptide  
21 fragment masses. These were searched against sequence databases containing known protein  
22 amino acid sequences using the Mascot software package. Based on Mascot LC-MS/MS search  
23 engine (Swissprot Database, human taxonomy), 647 unique proteins were identified, with a  
24 protein False Discovery Rate ≤1% and were identified in TSPO<sup>WT</sup>, TSPO<sup>A147T</sup>, and non-

1 transfected (WT) mitochondria that were immunoprecipitated by either V5 antibodies or control  
2 IgG (**Fig 2A, Table S1**). Further manual analysis using Scaffold software was carried out to  
3 exclude peptide sequences that were present in both the wild-type TSPO samples as well as the  
4 IgG controls, yielding a final list of 307 proteins expressed specifically in TSPO<sup>WT</sup>, TSPO<sup>A147T</sup>,  
5 samples, but not expressed (or minimally) in the controls. Of these, 44 proteins were known  
6 mitochondrial proteins, 51 proteins were of cytoplasmic localization, and the rest were nuclear  
7 GO annotated proteins. Subsequently, further manual stringent measures were taken to remove  
8 peptide sequences that were only present in less than 2 out of 3 IP TSPO<sup>WT</sup> and TSPO<sup>A147T</sup>  
9 replicates. This further limited the number of candidate proteins to 56 for TSPO<sup>WT</sup> and 47 for  
10 TSPO<sup>A147T</sup>. A significant difference ( $p < 0.01$ - $p < 0.1$ ) in total spectral counts between three  
11 biological replicates of each of TSPO<sup>WT</sup> and TSPO<sup>A147T</sup> was a further selection criterion applied  
12 to identify TSPO binding partners. Twenty-three candidate proteins interacted with both  
13 TSPO<sup>WT</sup> and TSPO<sup>A147T</sup>, and 7 candidate proteins interacted only with TSPO<sup>WT</sup> (**Fig 2A**). A  
14 functional protein association network analysis of the identified TSPO interaction partners was  
15 generated using STRING and Cytoscape bioinformatics software and are shown in **Fig 2B**. All  
16 of these candidate proteins were in the top 50% of the highest interaction probability and  
17 abundance (spectral counts). Of note are known interacting partners of TSPO, including  
18 VDAC1, VDAC2, VDAC3, and ATAD3A that were also identified in our IP-MS experiments,  
19 increasing confidence in our approach (**Fig 2B**).

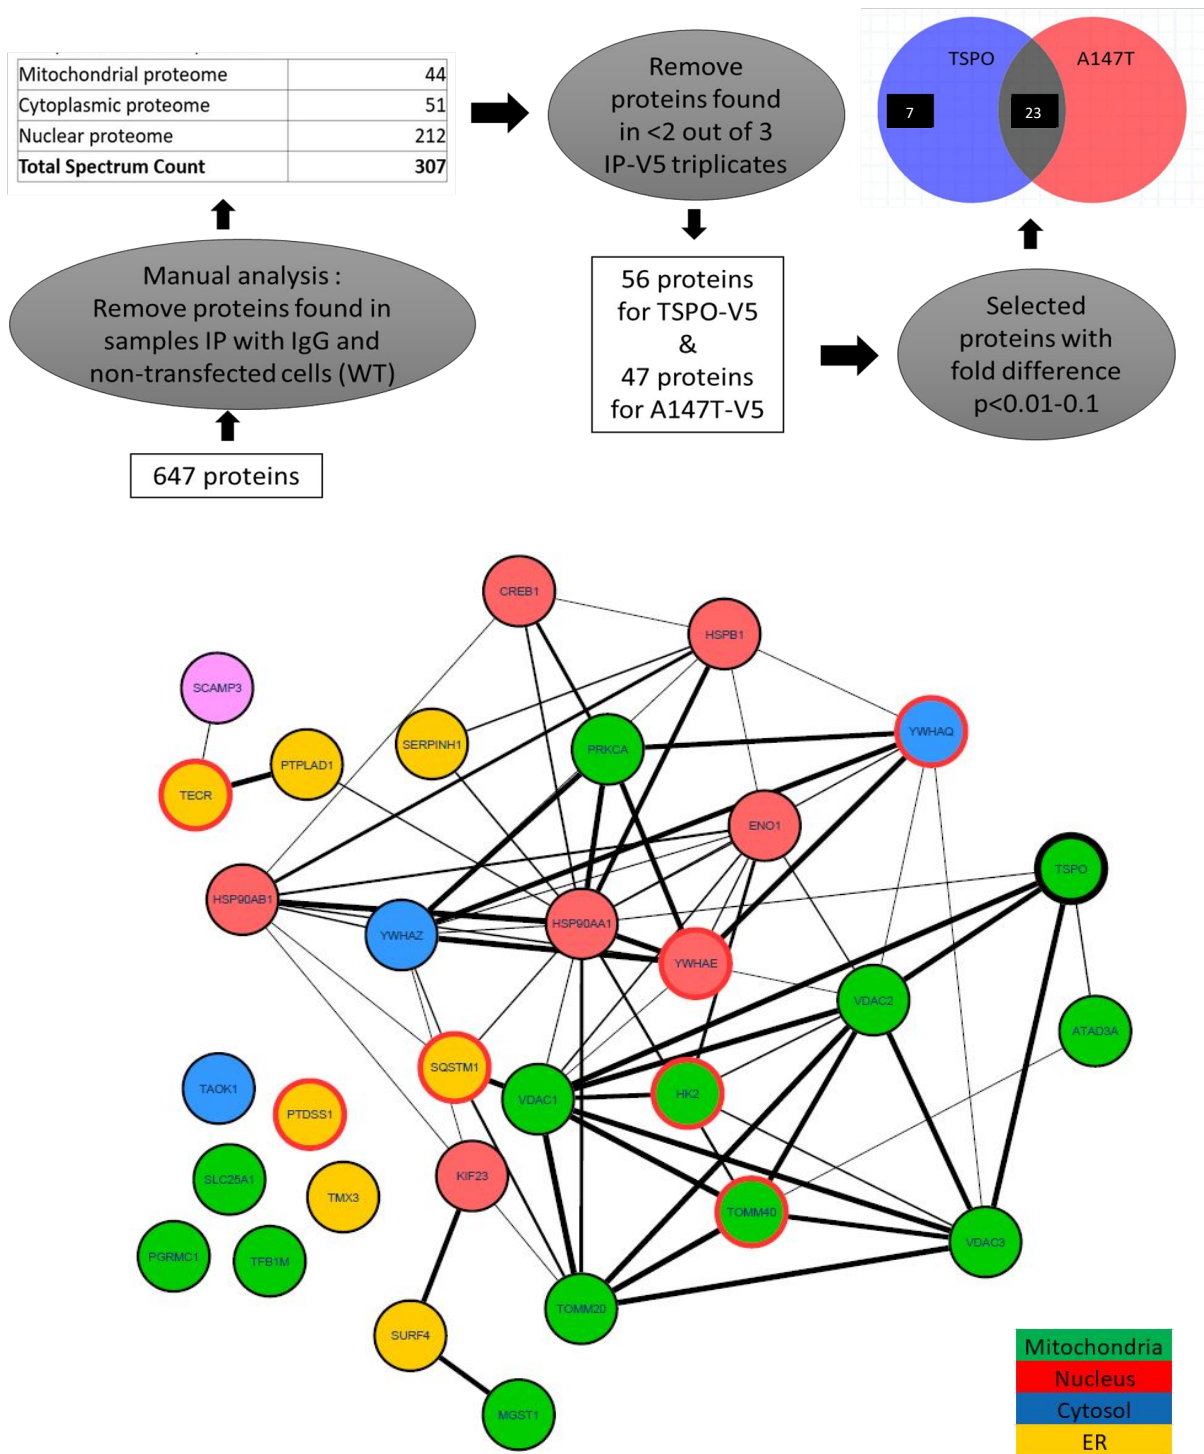

1

2 **Fig 2. Identification of binding partners of hTSPO<sup>WT</sup> and hTSPO<sup>A147T</sup> by label free semiquantitative**

3 **proteome analysis. A) Diagram of the immunoprecipitation-mass spectrometry approach to identify the**

4 **TSPO<sup>WT</sup> and TSPO<sup>A147T</sup> interactomes. We identified 56 proteins for V5-tagged human TSPO<sup>WT</sup> and 47**



1 proteins for human TSPO<sup>A147T</sup>, of which two thirds comprised of mitochondrial proteins and the  
2 remainder were cytoplasmic and nuclear proteins. Of these, 23 selected candidates interacted with both  
3 TSPO<sup>WT</sup> and TSPO<sup>A147T</sup> and 7 candidates interacted only with TSPO<sup>WT</sup>, after further selection criteria  
4 with protein fold difference of  $p < 0.01-0.1$  **B)** A functional protein association network generated using  
5 STRING (v10.5) and Cytoscape (v6.3.0) bioinformatics software. Network edges represent protein-  
6 protein associations and represent confidence, with the strength of the association represented by line  
7 thickness. The circles (nodes) depict specific proteins, and the color represents sub-cellular localization of  
8 each protein, as shown in the legend. The 7 protein candidates which interact solely with TSPO<sup>WT</sup> are  
9 indicated on nodes with red outlines. Nodes with no network edges represent proteins that have never  
10 previously been reported as TSPO interaction partners.

11

12 Analysis of the TSPO<sup>WT</sup> and TSPO<sup>A147T</sup> interactomes by protein domain ontology  
13 identified an enriched set of mitochondrial outer membrane proteins (**Table 1**. DAVID  
14 INTERPRO domain enrichment cluster 1,  $p = 3.7 \times 10^{-9}$ ) and ion channel binding proteins  
15 (**Table 1**. DAVID INTERPRO domain enrichment cluster 2,  $p = 1.5 \times 10^{-6}$ ). Mitochondrial outer  
16 membrane proteins constituting cluster 1 were VDAC1, VDAC2, VDAC3, HK2, MGST1,  
17 TOMM20, and TOMM40 (**Table 1**), whereas ion channel binding proteins constituting cluster 2  
18 were HSP90AA1, HSP90AB1, YWHAE, YWHAQ, and VDAC1 (**Table 1**).

| Biological process                           | Gene count | p-Value              | Genes                                                                                       | Fold change | FDR                  |
|----------------------------------------------|------------|----------------------|---------------------------------------------------------------------------------------------|-------------|----------------------|
| Annotation cluster 1 [Enrichment score 4.41] |            |                      |                                                                                             |             |                      |
| Mitochondrial outer membrane                 | 8          | $3.7 \times 10^{-9}$ | <i>HK2, MGST1, TOMM20, TOMM40, TSPO, VDAC1, VDAC2, VDAC3</i>                                | 32          | $4 \times 10^{-6}$   |
| Mitochondria                                 | 12         | $2.5 \times 10^{-7}$ | <i>ATAD3A, HK2, MGST1, PRKCA, SLC25A1, TFB1M, TOMM20, TOMM40, TSPO, VDAC1, VDAC2, VDAC3</i> | 7.1         | $2.7 \times 10^{-4}$ |
| Anion transport                              | 4          | $1.7 \times 10^{-6}$ | <i>TSPO, VDAC1, VDAC2, VDAC3</i>                                                            | 160         | $2.2 \times 10^{-3}$ |
| HLTV-I infection                             | 5          | $6.6 \times 10^{-3}$ | <i>CREB1, TSPO, VDAC1, VDAC2, VDAC3</i>                                                     | 6.2         | 7.2                  |
| Transport                                    | 8          | $2.1 \times 10^{-2}$ | <i>SCAMP3, SLC25A1, TOMM20, TOMM40, TSPO, VDAC1, VDAC2, VDAC3</i>                           | 2.7         | 2.1                  |
| Annotation cluster 2 [Enrichment score 3.3]  |            |                      |                                                                                             |             |                      |
| Ion channel binding                          | 6          | $1.5 \times 10^{-6}$ | <i>HSP90AA1, HSP90AB1, TSPO, YWHAE, YWHAQ, VDAC1</i>                                        | 29          | $1.8 \times 10^{-3}$ |
| Annotation cluster 3 [Enrichment score 3.14] |            |                      |                                                                                             |             |                      |
| Protein targeting                            | 4          | $4.1 \times 10^{-5}$ | <i>TOMM20, YWHAE, YWHAQ, YWHAZ</i>                                                          | 57          | $5.5 \times 10^{-2}$ |

1  
2 **Table 1. Functional annotation cluster analysis of TSPO binding partners extracted from from V5-**  
3 **tagged TSPO<sup>WT</sup> and TSPOA<sup>147T</sup>-transfected samples and detected by MS. Top 3 DAVID**  
4 **Bioinformatics Resources annotation clusters (n=31 proteins from three biological replicates). Fold**  
5 **change refers to enrichment in comparison to the whole human proteome (background list).**  
6 **Abbreviations: FDR, False Discovery Rate; MS, mass spectrometry; HLTV-I, Human T-cell leukemia**  
7 **virus type 1.**

8  
9 Our IP-MS results identify interactions of TSPO<sup>WT</sup> and TSPO<sup>A147T</sup> in cultured glial cells  
10 with proteins of heterogeneous functions, including protein transmembrane transport into  
11 intracellular organelle, ion channel binding and regulation of protein targeting, possibly  
12 explaining the multiple functions of TSPO in cells. Importantly, analysis of the TSPO<sup>A147T</sup>  
13 interactome revealed the loss of interactions with 7 proteins as compared to TSPO<sup>WT</sup>, namely  
14 mitochondrial import receptor subunit TOM40 homolog (TOMM40), 14-3-3 protein subunit  
15 epsilon (YWHAE), 14-3-3 protein subunit tau/theta (YWHAQ), hexokinase 2 (HK2),  
16 sequestosome 1 (SQSTM1), phosphatidylserine synthase 1 (PTDSS1), and trans-2,3 enoyl-CoA

1 reductase (TECR) (**Fig 2B**). Taken together, the *A147T* point mutation of TSPO might result in a  
2 loss of interacting partners important for mitochondrial and cell function.

3

#### 4 **Validation of selected human TSPO protein-protein interactions**

5        Specific interactions of several identified candidate binding partners of human TSPO<sup>WT</sup>  
6 and TSPO<sup>A147T</sup> were confirmed by co-immunoprecipitation (co-IP) from transiently transfected  
7 cells followed by immunoblotting. The chosen candidate binding partners were voltage-  
8 dependent anion-selective channel protein 1 (VDAC1), heat shock protein HSP90-alpha  
9 (HSP90AA1), 14-3-3 protein subunit theta (YWHAQ) and sequestosome-1 (SQSTM1). Two  
10 approaches of co-IP were employed. The first approach involved pull-down of cells  
11 overexpressing either V5-tagged TSPO<sup>WT</sup> or TSPO<sup>A147T</sup>, with antibodies against their respective  
12 interacting proteins and then immunoblotted for TSPO with V5 antibodies. The candidate  
13 proteins validated with this approach were VDAC1 and HSP90AA1. Cells overexpressing V5-  
14 tagged pcDNA was used as a negative control. As expected from our MS results, there were no  
15 differences in VDAC1 (**Fig 3A**) and HSP90AA1 interaction (**Fig 3B**) with either TSPO<sup>WT</sup> or  
16 TSPO<sup>A147T</sup>, respectively.

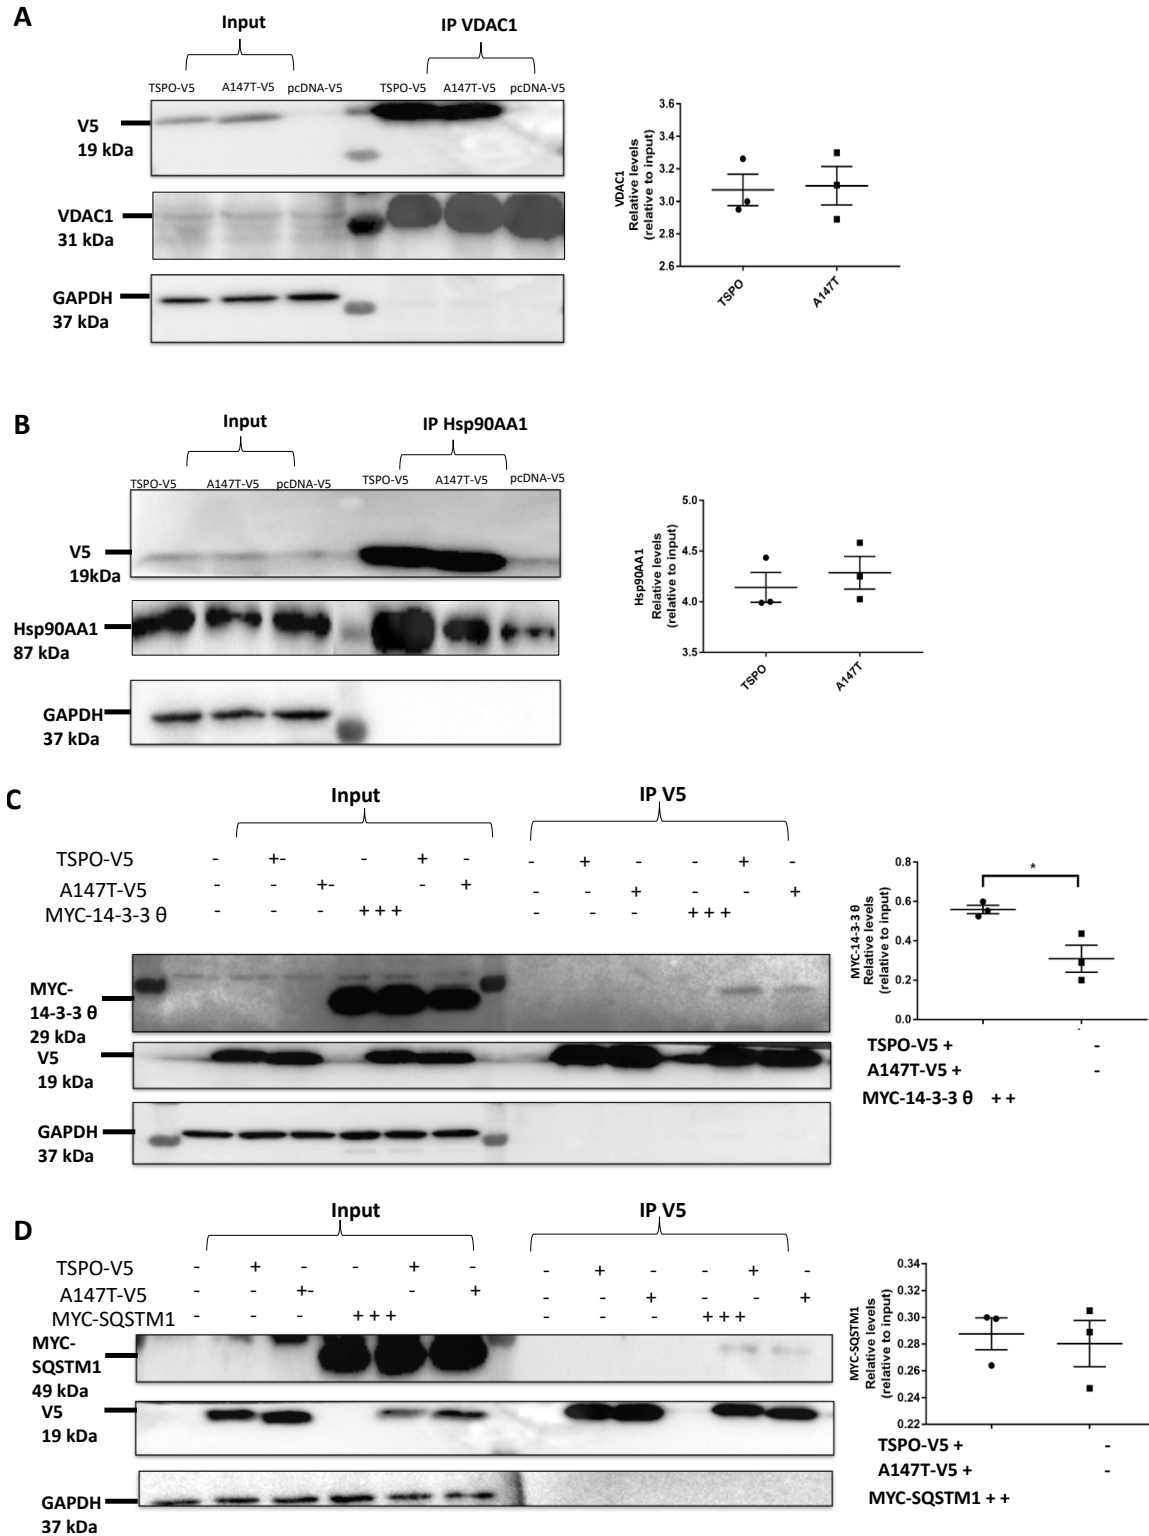

1

2 **Fig 3. Validated interactions of hTSPO<sup>WT</sup> and hTSPO<sup>A147T</sup>.** A) Co-immunoprecipitation (IP) of  
 3 voltage-dependent anion channel 1 (VDAC1) and hTSPO<sup>WT</sup> or hTSPO<sup>A147T</sup> with VDAC antibody and

1 detected by immunoblotting for V5 and VDAC1. GAPDH was used as loading control and did not co-  
2 precipitate with VDAC1. A comparable amount of V5-TSPO was co-purified with VDAC1 with each of  
3 TSPO<sup>WT</sup> and TSPO<sup>A147T</sup>. **B)** Co-IP of heat shock protein HSP90-alpha (Hsp90AA1) and hTSPO<sup>WT</sup> or  
4 hTSPO<sup>A147T</sup> with Hsp90AA1 antibody and detected by immunoblotting for V5 and Hsp90AA1. A  
5 comparable amount of V5-TSPO was co-purified with Hsp90AA1 with each of TSPO<sup>WT</sup> and TSPO<sup>A147T</sup>.  
6 C-D) 14-3-3  $\theta$  and sequestosome 1 (SQSTM1) were expressed in U87MG cells together with V5-tagged  
7 human TSPO<sup>WT</sup> or TSPO<sup>A147T</sup>. **C)** Co-IP of 14-3-3  $\theta$  and hTSPO<sup>WT</sup> or hTSPO<sup>A147T</sup> with V5 antibody and  
8 detected by immunoblotting for myc and V5. 14-3-3  $\theta$  was co-purified with V5 and weaker interaction  
9 was observed in TSPO<sup>A147T</sup> compare with TSPO<sup>WT</sup>. **D)** Co-IP of SQSTM1 and hTSPO<sup>WT</sup> or hTSPO<sup>A147T</sup>  
10 with V5 antibody and detected by immunoblotting for myc and V5. Comparable amount of SQSTM1 was  
11 co-purified with TSPO<sup>WT</sup> and TSPO<sup>A147T</sup>. Results from 3 independent experiments were quantified by  
12 densitometry using Image J and represented as mean  $\pm$  S.D. (Student t test) \*  $p < 0.05$ .

13  
14 The second approach involved co-IP with V5 antibody, of cells overexpressing either V5-  
15 tagged TSPO<sup>WT</sup>, TSPO<sup>A147T</sup> or pcDNA together with their respective interacting proteins tagged  
16 with Myc . The candidate proteins validated with this approach were 14-3-3 protein subunit theta  
17 (YWHAQ) and sequestosome-1 (SQSTM1). TSPO<sup>A147T</sup> had significantly lower interaction of  
18 YWHAQ compared to TSPO<sup>WT</sup>, indicating weaker YWHAQ interaction due to the *A147T*  
19 mutation (**Fig 3C**). Whereas there was no detectable difference in SQSTM1 interaction with  
20 TSPO between TSPO<sup>WT</sup> and TSPO<sup>A147T</sup> (**Fig 3D**). 14-3-3 protein subunit eta (YWHAH) and 14-  
21 3-3 subunit beta (YWHAB) were not on the interacting proteins list, and were therefore used as  
22 negative controls. Both YWHAH and YWHAB did not co-purified with TSPO, as expected,  
23 indicating the robustness and specificity of the mass-spectrometry list of interacting partners (**Fig**  
24 **S1**).

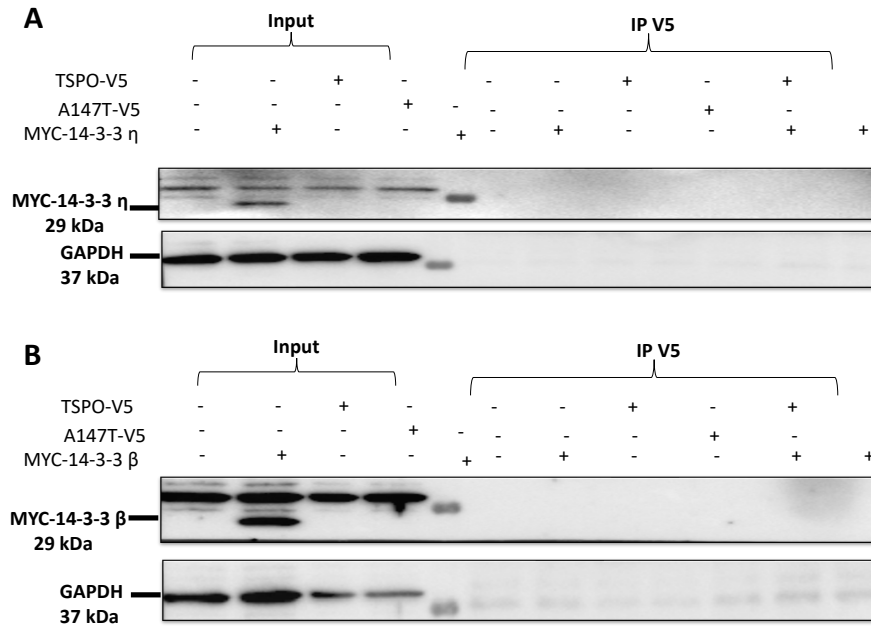

1

2 **Fig S1. Validated non-interactors of hTSPO<sup>WT</sup> and hTSPO<sup>A147T</sup>.** A-B) 14-3-3  $\eta$  protein (YWHAH)  
 3 and 14-3-3  $\beta$  (YWHAH) were expressed in U87MG cells together with V5-tagged human TSPO<sup>WT</sup> or  
 4 TSPO<sup>A147T</sup>. A) Co-IP of YWHAH and hTSPO<sup>WT</sup> or hTSPO<sup>A147T</sup> with V5 antibody and detected by  
 5 immunoblotting for myc. YWHAH was not co-purified with V5. B) Co-IP of YWHAH and hTSPO<sup>WT</sup> or  
 6 hTSPO<sup>A147T</sup> with V5 antibody and detected by immunoblotting for myc. YWHAH was not co-purified  
 7 with V5.

8

## 9 Discussion

10

11 Protein interactions of human full-length TSPO and its domain involving cholesterol  
 12 recognition/interaction amino acid consensus (CRAC) motif have been documented in previous  
 13 studies, which used blue-native polyacrylamide gel electrophoresis (BN-PAGE) coupled to MS  
 14 (25) and computational modelling with *in-silico* screening (30), respectively. However, the  
 15 effect of the common TSPO polymorphism *A147T* on protein interactions remains unknown. To

1 date, only the effect of *A147T* TSPO on protein structure and stability have been reported (31,  
2 32). Our current study identified putative binding partners of human full-length TSPO and its  
3 *A147T* polymorphism variant using IP-MS biased towards mitochondrial proteins. Employing  
4 IP-MS of mitochondrial proteins isolated from cells overexpressing either TSPO<sup>WT</sup> and  
5 TSPO<sup>A147T</sup> and downstream rigorous peptide analysis using Scaffold software (24), we detected  
6 30 protein-protein interactions (PPIs) of hTSPO<sup>WT</sup> and 23 PPIs of hTSPO<sup>A147T</sup> with high  
7 confidence, suggesting that the *A147T* variant of human TSPO results in an alteration of the  
8 TSPO protein interactome. The *A147T* mutation not only significantly alters the protein  
9 flexibility and stability, but also decreases the half-life of the mutant protein by about 25 percent  
10 (31). Such structural changes would increase TSPO<sup>A147T</sup> turnover, and may, at least in part,  
11 explain its effect on reducing the number of protein interactions.

12  
13 Among the 30 TSPO<sup>WT</sup> PPIs and 23 TSPO<sup>A147T</sup> PPIs were a number of known  
14 mitochondrial TSPO interaction partners, increasing our confidence in our proteomic data sets.  
15 These included the voltage-dependent anion-selective channel protein 1 (VDAC1) (27), voltage-  
16 dependent anion-selective channel protein 2 (VDAC2), voltage-dependent anion-selective  
17 channel protein 3 (VDAC3) (33), and ATPase family AAA domain-containing protein 3A  
18 (ATAD3A) (25). Since we performed the IP-MS using isolated mitochondria, it is not surprising  
19 that, mitochondrial proteins were the most prevalent amongst the 30 TSPO<sup>WT</sup> PPIs and 23  
20 TSPO<sup>A147T</sup> PPIs identified. However, we also identified a number of nuclear and cytoplasmic  
21 proteins as TSPO interaction partners. Although this may reflect impurities during mitochondrial  
22 preparations, an alternative explanation is that this reflects interactions at the surface of  
23 mitochondria, where TSPO resides (34). We found that the *A147T* polymorphism in TSPO is

1 associated with loss of a small subset of interaction partners implicated in mitochondrial outer  
2 membrane organization, ion channel binding, and protein targeting functions. Of the confirmed  
3 interaction partners, only 14-3-3 protein subunit theta (YWHAQ) showed weaker interaction  
4 with TSPO<sup>A147T</sup>, suggesting this point mutation modulates specifically protein interactions. Our  
5 results suggest that the *A147T* polymorphism of human TSPO partially changes its interactome,  
6 and thus its molecular function, as compared with non-mutant full-length human TSPO. Our IP-  
7 MS data suggests differential interaction of TSPO<sup>WT</sup> and TSPO<sup>A147T</sup> with outer mitochondrial  
8 membrane proteins HK2 and TOMM40 with hTSPO<sup>A147T</sup>, as well as ion channel binding  
9 proteins and targeting proteins YWHAE and YWHAQ. Whether these normal interactions are  
10 directly with TSPO<sup>WT</sup> or indirectly remains to be shown. Indirect interactions of TSPO with  
11 nuclear proteins have been reported for YWHAE through VDAC1 protein (35). Indirect  
12 interaction via VDAC1 or VDAC2 (27, 36) are unlikely, since their interaction with TSPO was  
13 not compromised by the *A147T* polymorphism. TSPO interaction with YWHAG is mediated  
14 through Ser-194 of the steroidogenic acute regulatory protein (STAR) (37). However, YWHAG  
15 was not identified in our study, possibly due to the different cell types used by Aghazadeh and  
16 colleagues (MA10 mouse Leydig cells) (37), that have a very different protein expression pattern  
17 compared to the human glioblastoma cells (U87MG) used in our study (38).

18 To our knowledge, this is the first report of YWHAQ as an interactor of TSPO<sup>WT</sup> and  
19 with reduced affinity to hTSPO<sup>A147T</sup>. More than 200 proteins have been found to interact with  
20 14-3-3 family members (there are seven isoforms in mammals :  $\beta$ ,  $\gamma$ ,  $\epsilon$ ,  $\eta$ ,  $\zeta$ ,  $\sigma$ , and  $\tau/\theta$ ), a group  
21 of proteins which are not only steroidogenesis-related proteins but also include protein kinases,  
22 enzymes, cell cycle control-related proteins, and apoptosis-related proteins (39). In addition, 14-  
23 3-3 proteins localize to disease-specific injury sites and toxic protein aggregates in the brain,



1 which may contribute to the regulation of disease pathogenesis (40). As a result, 14-3-3 proteins  
2 may have either a protective role by facilitating sequestration of pathogenic proteins, or a  
3 detrimental role by promoting protein aggregate formation, neurotoxicity, and/or loss of  
4 stabilization of binding partners (41). For example, YWHAQ and YWHAE have been found to  
5 inhibit apoptosis induced by rotenone in a cellular model of PD (42). Based on DAVID  
6 Functional Clustering enrichment analysis, we propose that TSPO's interaction with YWHAQ  
7 might contribute to the regulation of TSPO's targeting into mitochondrial membranes involved  
8 in apoptotic signaling pathways. Since, YWHAQ is known to inhibit apoptosis (42), and TSPO  
9 has been shown to be involved in apoptosis via its interaction with VDAC by generating ROS  
10 production which leads to activation of mitophagy (43), carriers of the *A147T* TSPO may be  
11 more prone to cellular apoptosis through its weaker interaction with YWHAQ.

12 TSPO interaction with VDAC has been well-documented for more than two decades (36)  
13 and is consistently observed in the transducesome that bridges the inner and outer  
14 mitochondrial membrane. This interaction is best characterised for its role in hormone-induced  
15 steroidogenesis (44). The direct interaction of TSPO with VDAC has been demonstrated with  
16 various methods including blue native PAGE (25), immunoprecipitation and microscopy (44)  
17 and copurification (45). However, the mode of this interaction at the molecular level is still not  
18 well characterized, despite the advent of high-resolution crystal structures of both TSPO (46) and  
19 VDAC (47, 48). Heat shock proteins (HSPs), including HSP90AA1, are known to play an  
20 important role in delivering proteins to the outer mitochondrial membrane (OMM) for import  
21 and facilitating translocation in an ATP dependent manner (49). Finally, SQSTM1, which has an  
22 indirect interaction with TSPO via VDAC1, has been shown to have impaired mitochondrial  
23 relocation of SQSTM1/p62 due to TSPO and ultimately leads to the accumulation of

1 dysfunctional mitochondria (23). Consistent with these findings, VDAC1, HSP90AA1 and  
2 SQSTM1 were identified via IP-MS in the current study. However, there were no differences in  
3 interaction between TSPO<sup>WT</sup> and TSPO<sup>A147T</sup> with regards to VDAC1, HSP90AA1 and SQSTM1,  
4 suggesting that the A147T polymorphism does not compromise these interactions.

5 In summary, our results identified the loss of a subset of interaction partners with the  
6 A147T polymorphism variant of human TSPO that are implicated in mitochondrial outer  
7 membrane organization, ion channel binding, and protein targeting functions. Future studies  
8 should aim at understanding the functional relevance of compromised protein-protein  
9 interactions as a result of the *A147T* TSPO polymorphism *in vivo*.

10

## 11 **Acknowledgement**

12 This work was supported by funding from the National Health and Medical Research Council  
13 and the Australian Research Council to M.K., Y.D.K. and L.M.I..

14

## 15 **Conflict of interest statement**

16 The authors declare to have no competing interests.

17

## 18 **Authors contributions**

- 1 Study design: Y.D.K. and L.M.I.; Experiments and data analysis: P.R.A. and A.P.; Funding:
- 2 M.K., Y.D.K. and L.M.I.; Project supervision: Y.D.K. and L.M.I.; Manuscript draft: P.R.A.;
- 3 Manuscript editing: all authors.

## 1   **References**

- 2   1.   Papadopoulos V, Baraldi M, Guilarte TR, Knudsen TB, Lacapere JJ, Lindemann P, et al.  
3       Translocator protein (18kDa): new nomenclature for the peripheral-type benzodiazepine  
4       receptor based on its structure and molecular function. *Trends Pharmacol Sci.*  
5       2006;27(8):402-9.
- 6   2.   Krueger KE, Papadopoulos V. Mitochondrial benzodiazepine receptors and the regulation  
7       of steroid biosynthesis. *Annu Rev Pharmacol Toxicol.* 1992;32:211-37.
- 8   3.   Li H, Yao Z, Degenhardt B, Teper G, Papadopoulos V. Cholesterol binding at the  
9       cholesterol recognition/ interaction amino acid consensus (CRAC) of the peripheral-type  
10      benzodiazepine receptor and inhibition of steroidogenesis by an HIV TAT-CRAC peptide.  
11      *Proc Natl Acad Sci U S A.* 2001;98(3):1267-72.
- 12  4.   Tu LN, Morohaku K, Manna PR, Pelton SH, Butler WR, Stocco DM, et al. Peripheral  
13      benzodiazepine receptor/translocator protein global knock-out mice are viable with no  
14      effects on steroid hormone biosynthesis. *J Biol Chem.* 2014;289(40):27444-54.
- 15  5.   Li F, Xia Y, Meiler J, Ferguson-Miller S. Characterization and modeling of the oligomeric  
16      state and ligand binding behavior of purified translocator protein 18 kDa from *Rhodobacter*  
17      *sphaeroides*. *Biochemistry.* 2013;52(34):5884-99.
- 18  6.   Braestrup C, Squires RF. Specific benzodiazepine receptors in rat brain characterized by  
19      high-affinity (3H)diazepam binding. *Proc Natl Acad Sci U S A.* 1977;74(9):3805-9.
- 20  7.   De Souza EB, Anholt RR, Murphy KM, Snyder SH, Kuhar MJ. Peripheral-type  
21      benzodiazepine receptors in endocrine organs: autoradiographic localization in rat  
22      pituitary, adrenal, and testis. *Endocrinology.* 1985;116(2):567-73.

- 1 8. Rupprecht R, Papadopoulos V, Rammes G, Baghai TC, Fan J, Akula N, et al. Translocator  
2 protein (18 kDa) (TSPO) as a therapeutic target for neurological and psychiatric disorders.  
3 *Nat Rev Drug Discov.* 2010;9(12):971-88.
- 4 9. Schweitzer PJ, Fallon BA, Mann JJ, Kumar JS. PET tracers for the peripheral  
5 benzodiazepine receptor and uses thereof. *Drug Discov Today.* 2010;15(21-22):933-42.
- 6 10. Werry EL, Bright FM, Piguet O, Ittner LM, Halliday GM, Hodges JR, et al. Recent  
7 Developments in TSPO PET Imaging as A Biomarker of Neuroinflammation in  
8 Neurodegenerative Disorders. *Int J Mol Sci.* 2019;20(13).
- 9 11. Chua SW, Kassiou M, Ittner LM. The translocator protein as a drug target in Alzheimer's  
10 disease. *Expert Rev Neurother.* 2014;14(4):439-48.
- 11 12. Veenman L, Gavish M. The role of 18 kDa mitochondrial translocator protein (TSPO) in  
12 programmed cell death, and effects of steroids on TSPO expression. *Curr Mol Med.*  
13 2012;12(4):398-412.
- 14 13. Guo Q, Colasanti A, Owen DR, Onega M, Kamalakaran A, Bennacef I, et al.  
15 Quantification of the specific translocator protein signal of 18F-PBR111 in healthy  
16 humans: a genetic polymorphism effect on in vivo binding. *J Nucl Med.*  
17 2013;54(11):1915-23.
- 18 14. Owen DR, Gunn RN, Rabiner EA, Bennacef I, Fujita M, Kreisl WC, et al. Mixed-affinity  
19 binding in humans with 18-kDa translocator protein ligands. *J Nucl Med.* 2011;52(1):24-  
20 32.
- 21 15. Colasanti A, Owen DR, Grozeva D, Rabiner EA, Matthews PM, Craddock N, et al. Bipolar  
22 Disorder is associated with the rs6971 polymorphism in the gene encoding 18 kDa  
23 Translocator Protein (TSPO). *Psychoneuroendocrinology.* 2013;38(11):2826-9.

- 1 16. Lacapere JJ, Duma L, Finet S, Kassiou M, Papadopoulos V. Insight into the Structural  
2 Features of TSPO: Implications for Drug Development. *Trends Pharmacol Sci.*  
3 2020;41(2):110-22.
- 4 17. Clayton DA, Shadel GS. Isolation of mitochondria from tissue culture cells. *Cold Spring*  
5 *Harb Protoc.* 2014;2014(10):pdb prot080002.
- 6 18. Ittner LM, Koller D, Muff R, Fischer JA, Born W. The N-terminal extracellular domain  
7 23-60 of the calcitonin receptor-like receptor in chimeras with the parathyroid hormone  
8 receptor mediates association with receptor activity-modifying protein 1. *Biochemistry.*  
9 2005;44(15):5749-54.
- 10 19. Longo PA, Kavran JM, Kim MS, Leahy DJ. Transient mammalian cell transfection with  
11 polyethylenimine (PEI). *Methods Enzymol.* 2013;529:227-40.
- 12 20. Ittner A, Chua SW, Bertz J, Volkerling A, van der Hoven J, Gladbach A, et al. Site-specific  
13 phosphorylation of tau inhibits amyloid-beta toxicity in Alzheimer's mice. *Science.*  
14 2016;354(6314):904-8.
- 15 21. Prikas E, Poljak A, Ittner A. Mapping p38alpha mitogen-activated protein kinase signaling  
16 by proximity-dependent labeling. *Protein Sci.* 2020;29(5):1196-210.
- 17 22. Koenig T, Menze BH, Kirchner M, Monigatti F, Parker KC, Patterson T, et al. Robust  
18 prediction of the MASCOT score for an improved quality assessment in mass  
19 spectrometric proteomics. *J Proteome Res.* 2008;7(9):3708-17.
- 20 23. Nesvizhskii AI, Keller A, Kolker E, Aebersold R. A statistical model for identifying  
21 proteins by tandem mass spectrometry. *Anal Chem.* 2003;75(17):4646-58.
- 22 24. Searle BC. Scaffold: a bioinformatic tool for validating MS/MS-based proteomic studies.  
23 *Proteomics.* 2010;10(6):1265-9.

- 1 25. Rone MB, Midzak AS, Issop L, Rammouz G, Jagannathan S, Fan J, et al. Identification of  
2 a dynamic mitochondrial protein complex driving cholesterol import, trafficking, and  
3 metabolism to steroid hormones. *Mol Endocrinol*. 2012;26(11):1868-82.
- 4 26. Liu J, Rone MB, Papadopoulos V. Protein-protein interactions mediate mitochondrial  
5 cholesterol transport and steroid biosynthesis. *J Biol Chem*. 2006;281(50):38879-93.
- 6 27. Gatliff J, East D, Crosby J, Abeti R, Harvey R, Craigen W, et al. TSPO interacts with  
7 VDAC1 and triggers a ROS-mediated inhibition of mitochondrial quality control.  
8 *Autophagy*. 2014;10(12):2279-96.
- 9 28. ten Have S, Boulon S, Ahmad Y, Lamond AI. Mass spectrometry-based immuno-  
10 precipitation proteomics - the user's guide. *Proteomics*. 2011;11(6):1153-9.
- 11 29. Allen M, Bjerke M, Edlund H, Nelander S, Westermark B. Origin of the U87MG glioma  
12 cell line: Good news and bad news. *Sci Transl Med*. 2016;8(354):354re3.
- 13 30. Midzak AS, Akula N, Rone MB, Papadopoulos V. Computational modeling and biological  
14 validation of novel non-steroidal ligands for the cholesterol recognition/interaction amino  
15 acid consensus (CRAC) motif of the mitochondrial translocator protein (TSPO). *Pharmacol*  
16 *Res*. 2015;99:393-403.
- 17 31. Milenkovic VM, Bader S, Sudria-Lopez D, Siebert R, Brandl C, Nothdurfter C, et al.  
18 Effects of genetic variants in the TSPO gene on protein structure and stability. *PLoS One*.  
19 2018;13(4):e0195627.
- 20 32. Jaremko M, Jaremko L, Giller K, Becker S, Zweckstetter M. Structural Integrity of the  
21 A147T Polymorph of Mammalian TSPO. *Chembiochem*. 2015;16(10):1483-9.

- 1 33. Gatliff J, East DA, Singh A, Alvarez MS, Frison M, Matic I, et al. A role for TSPO in  
2 mitochondrial Ca(2+) homeostasis and redox stress signaling. *Cell Death Dis.*  
3 2017;8(6):e2896.
- 4 34. Selvaraj V, Stocco DM, Tu LN. Minireview: translocator protein (TSPO) and  
5 steroidogenesis: a reappraisal. *Mol Endocrinol.* 2015;29(4):490-501.
- 6 35. Aghazadeh Y, Martinez-Arguelles DB, Fan J, Culty M, Papadopoulos V. Induction of  
7 androgen formation in the male by a TAT-VDAC1 fusion peptide blocking 14-3-  
8 3varepsilon protein adaptor and mitochondrial VDAC1 interactions. *Mol Ther.*  
9 2014;22(10):1779-91.
- 10 36. Shoshan-Barmatz V, Pittala S, Mizrahi D. VDAC1 and the TSPO: Expression,  
11 Interactions, and Associated Functions in Health and Disease States. *Int J Mol Sci.*  
12 2019;20(13).
- 13 37. Aghazadeh Y, Rone MB, Blonder J, Ye X, Veenstra TD, Hales DB, et al. Hormone-  
14 induced 14-3-3gamma adaptor protein regulates steroidogenic acute regulatory protein  
15 activity and steroid biosynthesis in MA-10 Leydig cells. *J Biol Chem.*  
16 2012;287(19):15380-94.
- 17 38. Pei J, Moon KS, Pan S, Lee KH, Ryu HH, Jung TY, et al. Proteomic Analysis between  
18 U87MG and U343MG-A Cell Lines: Searching for Candidate Proteins for Glioma  
19 Invasion. *Brain Tumor Res Treat.* 2014;2(1):22-8.
- 20 39. Mackintosh C. Dynamic interactions between 14-3-3 proteins and phosphoproteins  
21 regulate diverse cellular processes. *Biochem J.* 2004;381(Pt 2):329-42.
- 22 40. Steinacker P, Aitken A, Otto M. 14-3-3 proteins in neurodegeneration. *Semin Cell Dev*  
23 *Biol.* 2011;22(7):696-704.



- 1 41. Shimada T, Fournier AE, Yamagata K. Neuroprotective function of 14-3-3 proteins in  
2 neurodegeneration. *Biomed Res Int*. 2013;2013:564534.
- 3 42. Betarbet R, Sherer TB, MacKenzie G, Garcia-Osuna M, Panov AV, Greenamyre JT.  
4 Chronic systemic pesticide exposure reproduces features of Parkinson's disease. *Nat*  
5 *Neurosci*. 2000;3(12):1301-6.
- 6 43. Veenman L, Shandalov Y, Gavish M. VDAC activation by the 18 kDa translocator protein  
7 (TSPO), implications for apoptosis. *J Bioenerg Biomembr*. 2008;40(3):199-205.
- 8 44. Rone MB, Fan J, Papadopoulos V. Cholesterol transport in steroid biosynthesis: role of  
9 protein-protein interactions and implications in disease states. *Biochim Biophys Acta*.  
10 2009;1791(7):646-58.
- 11 45. Ben-Hail D, Shoshan-Barmatz V. Purification of VDAC1 from rat liver mitochondria.  
12 *Cold Spring Harb Protoc*. 2014;2014(1):94-9.
- 13 46. Li F, Liu J, Zheng Y, Garavito RM, Ferguson-Miller S. Protein structure. Crystal structures  
14 of translocator protein (TSPO) and mutant mimic of a human polymorphism. *Science*.  
15 2015;347(6221):555-8.
- 16 47. Ujwal R, Cascio D, Colletier JP, Faham S, Zhang J, Toro L, et al. The crystal structure of  
17 mouse VDAC1 at 2.3 Å resolution reveals mechanistic insights into metabolite gating.  
18 *Proc Natl Acad Sci U S A*. 2008;105(46):17742-7.
- 19 48. Bayrhuber M, Meins T, Habeck M, Becker S, Giller K, Villinger S, et al. Structure of the  
20 human voltage-dependent anion channel. *Proc Natl Acad Sci U S A*. 2008;105(40):15370-  
21 5.

- 1 49. Fan AC, Bhangoo MK, Young JC. Hsp90 functions in the targeting and outer membrane
- 2 translocation steps of Tom70-mediated mitochondrial import. *J Biol Chem.*
- 3 2006;281(44):33313-24.

4
